# Supplementary material for: Mesenchymal stromal cell-derived extracellular vesicles reduce lung inflammation and damage in nonclinical acute lung injury: Implications for COVID-19
Source: PubMed Central journal article supplement (PMC8592477; doi:10.1371/journal.pone.0259732), 2021-11-15

FLOT1 Full Blot: expected 47 kDa

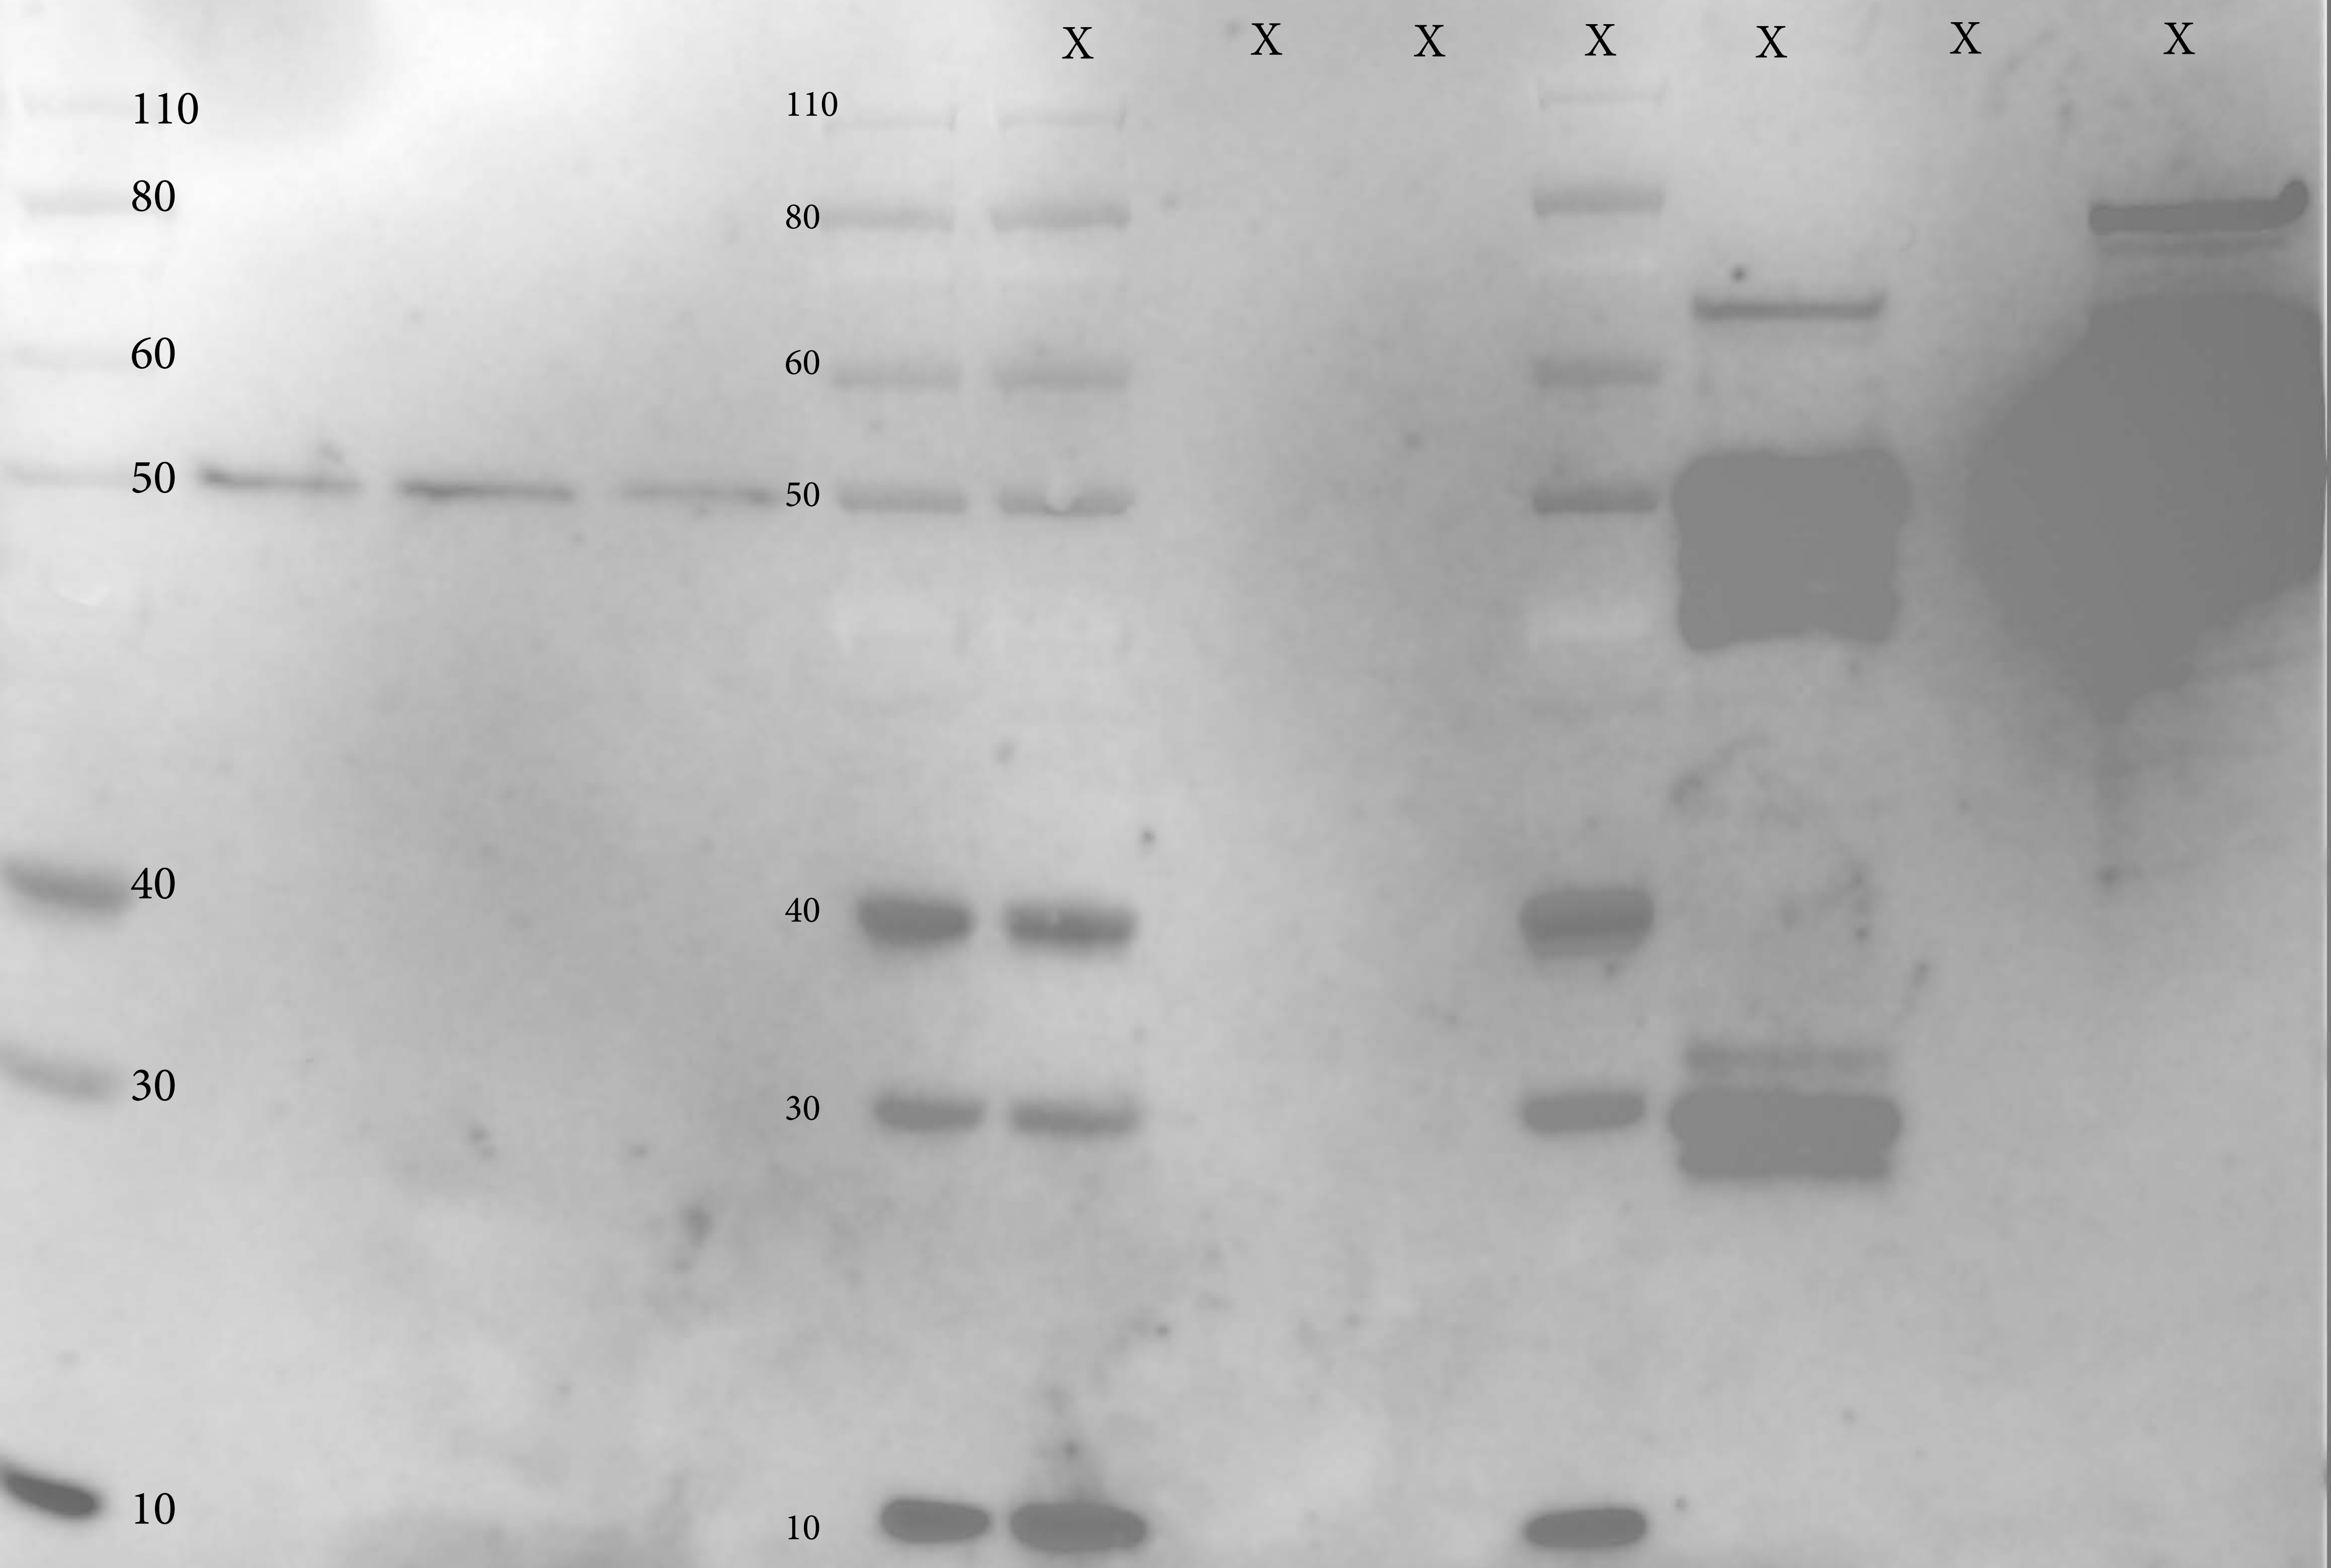

Annexin 2 Full Blot: expected 38 kDa

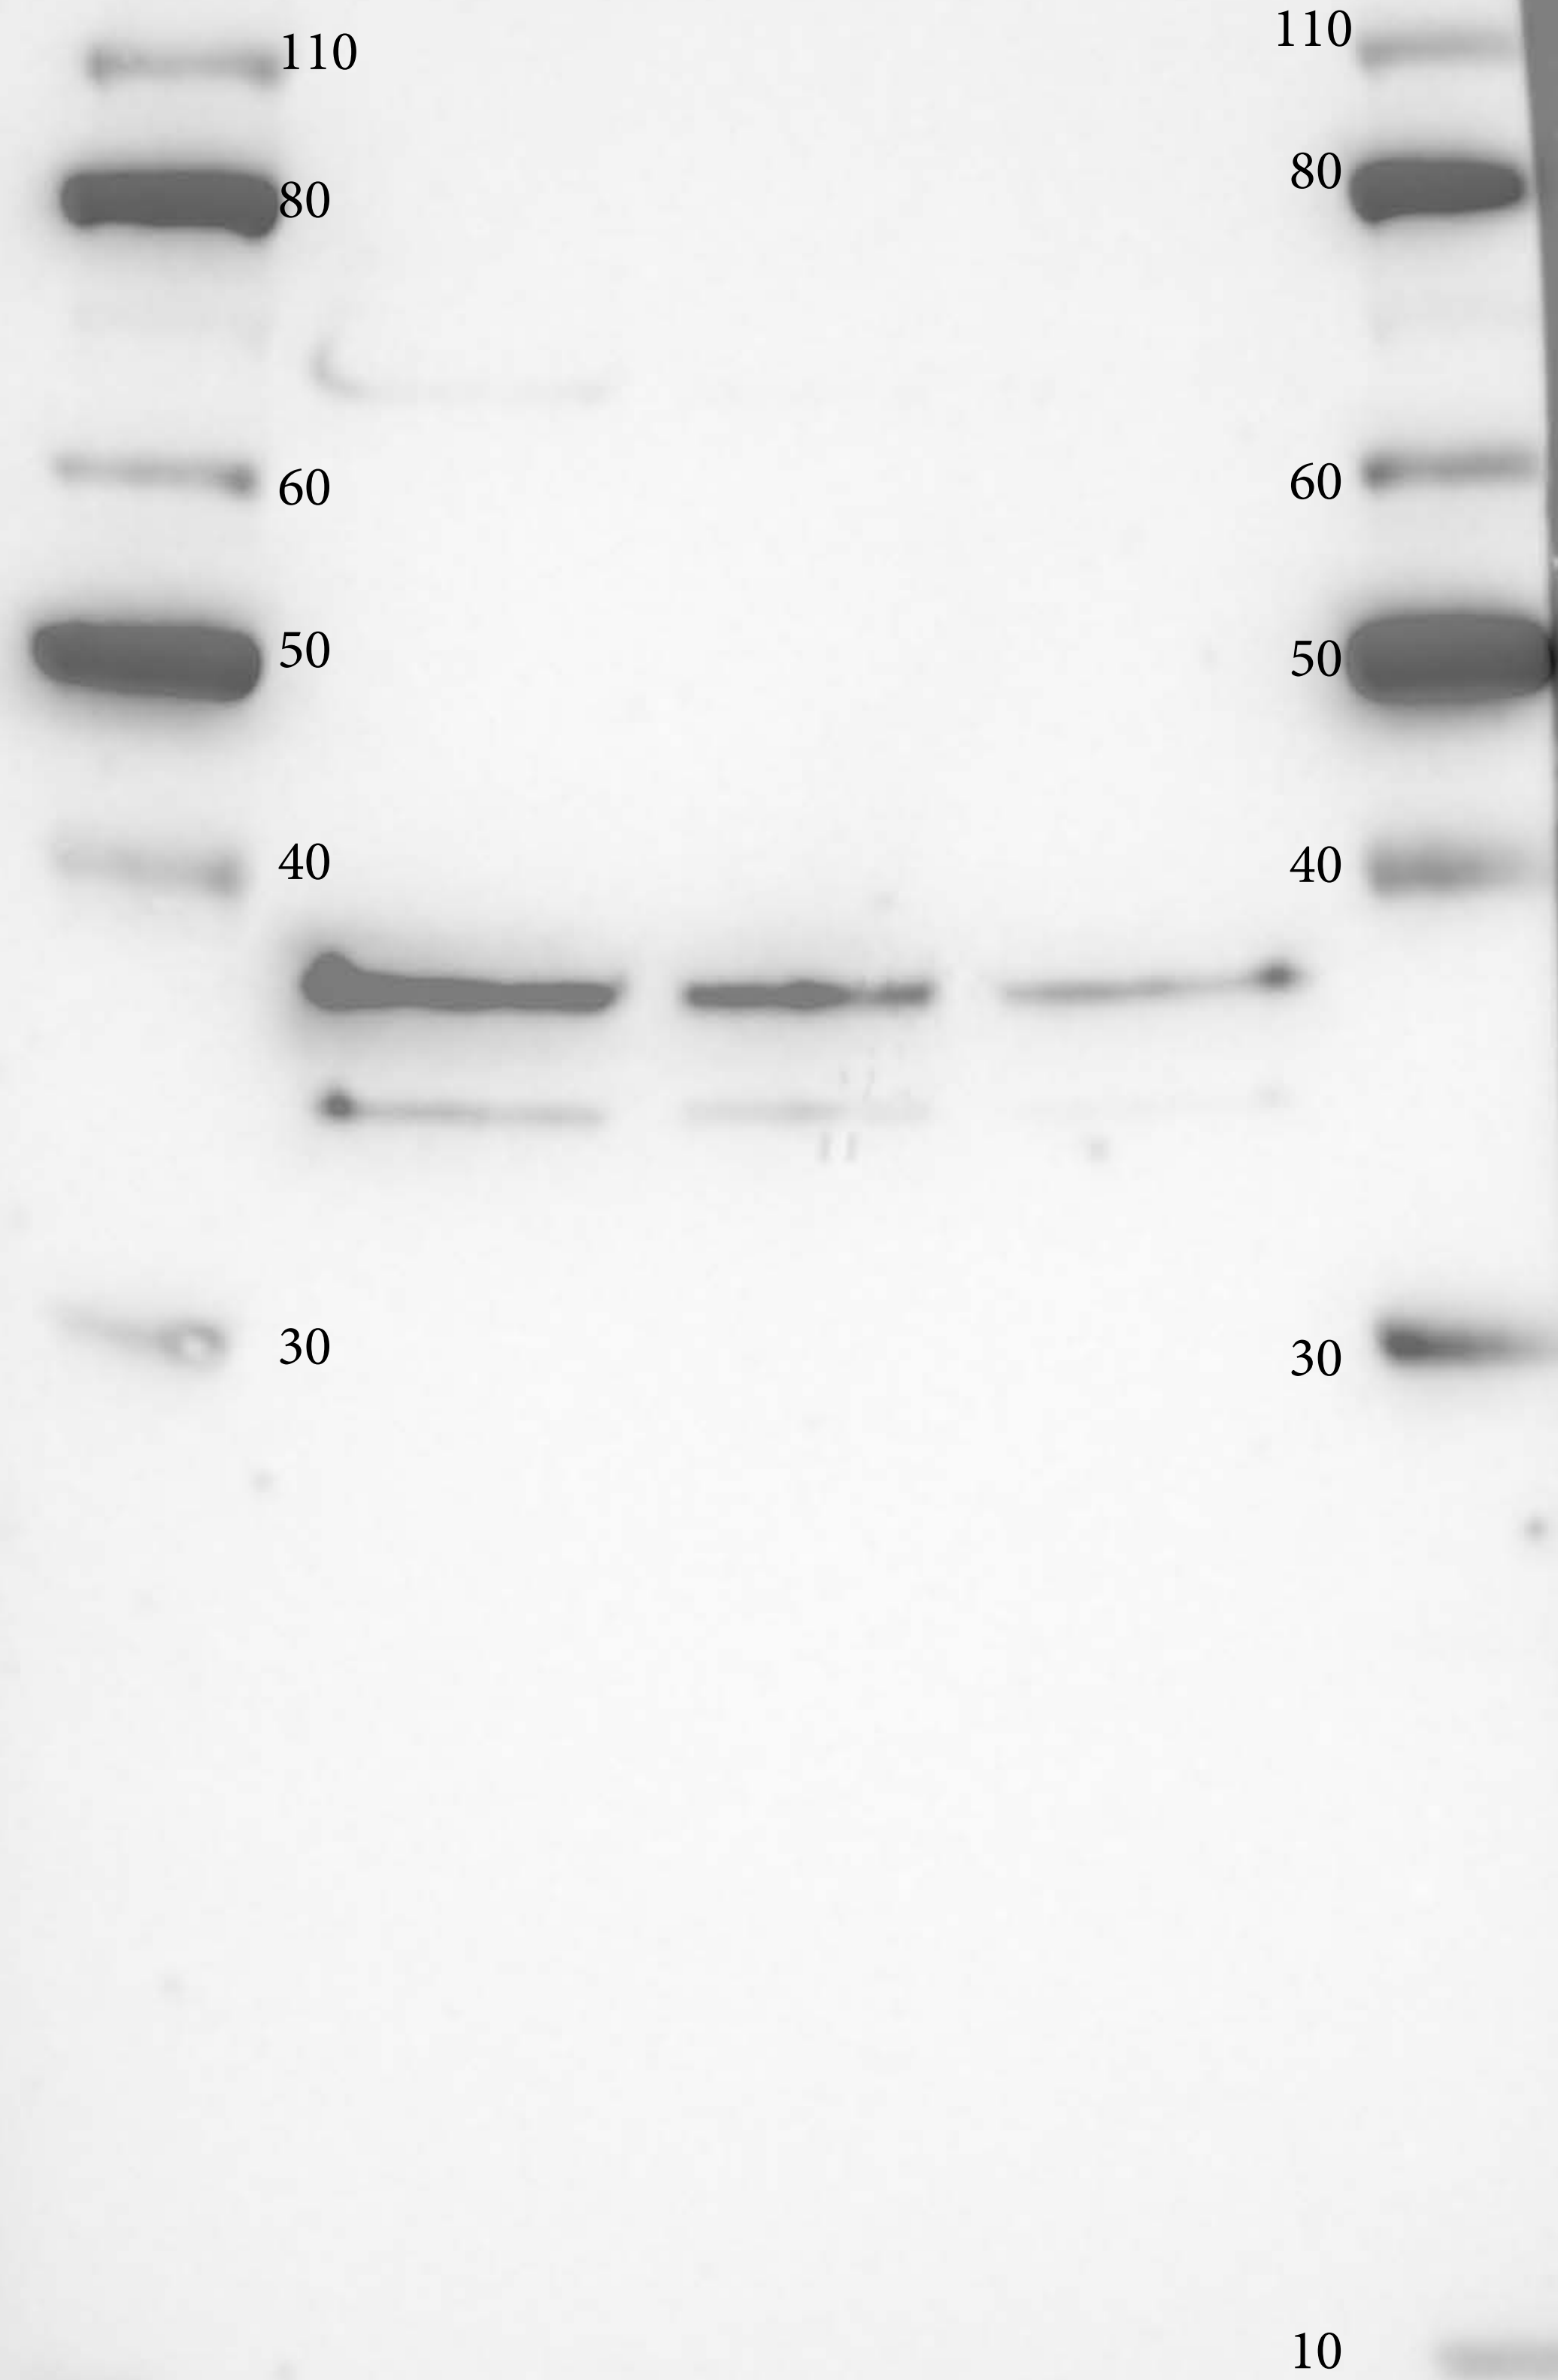

Syntenin 1 Full Blot: expected 32 kDa

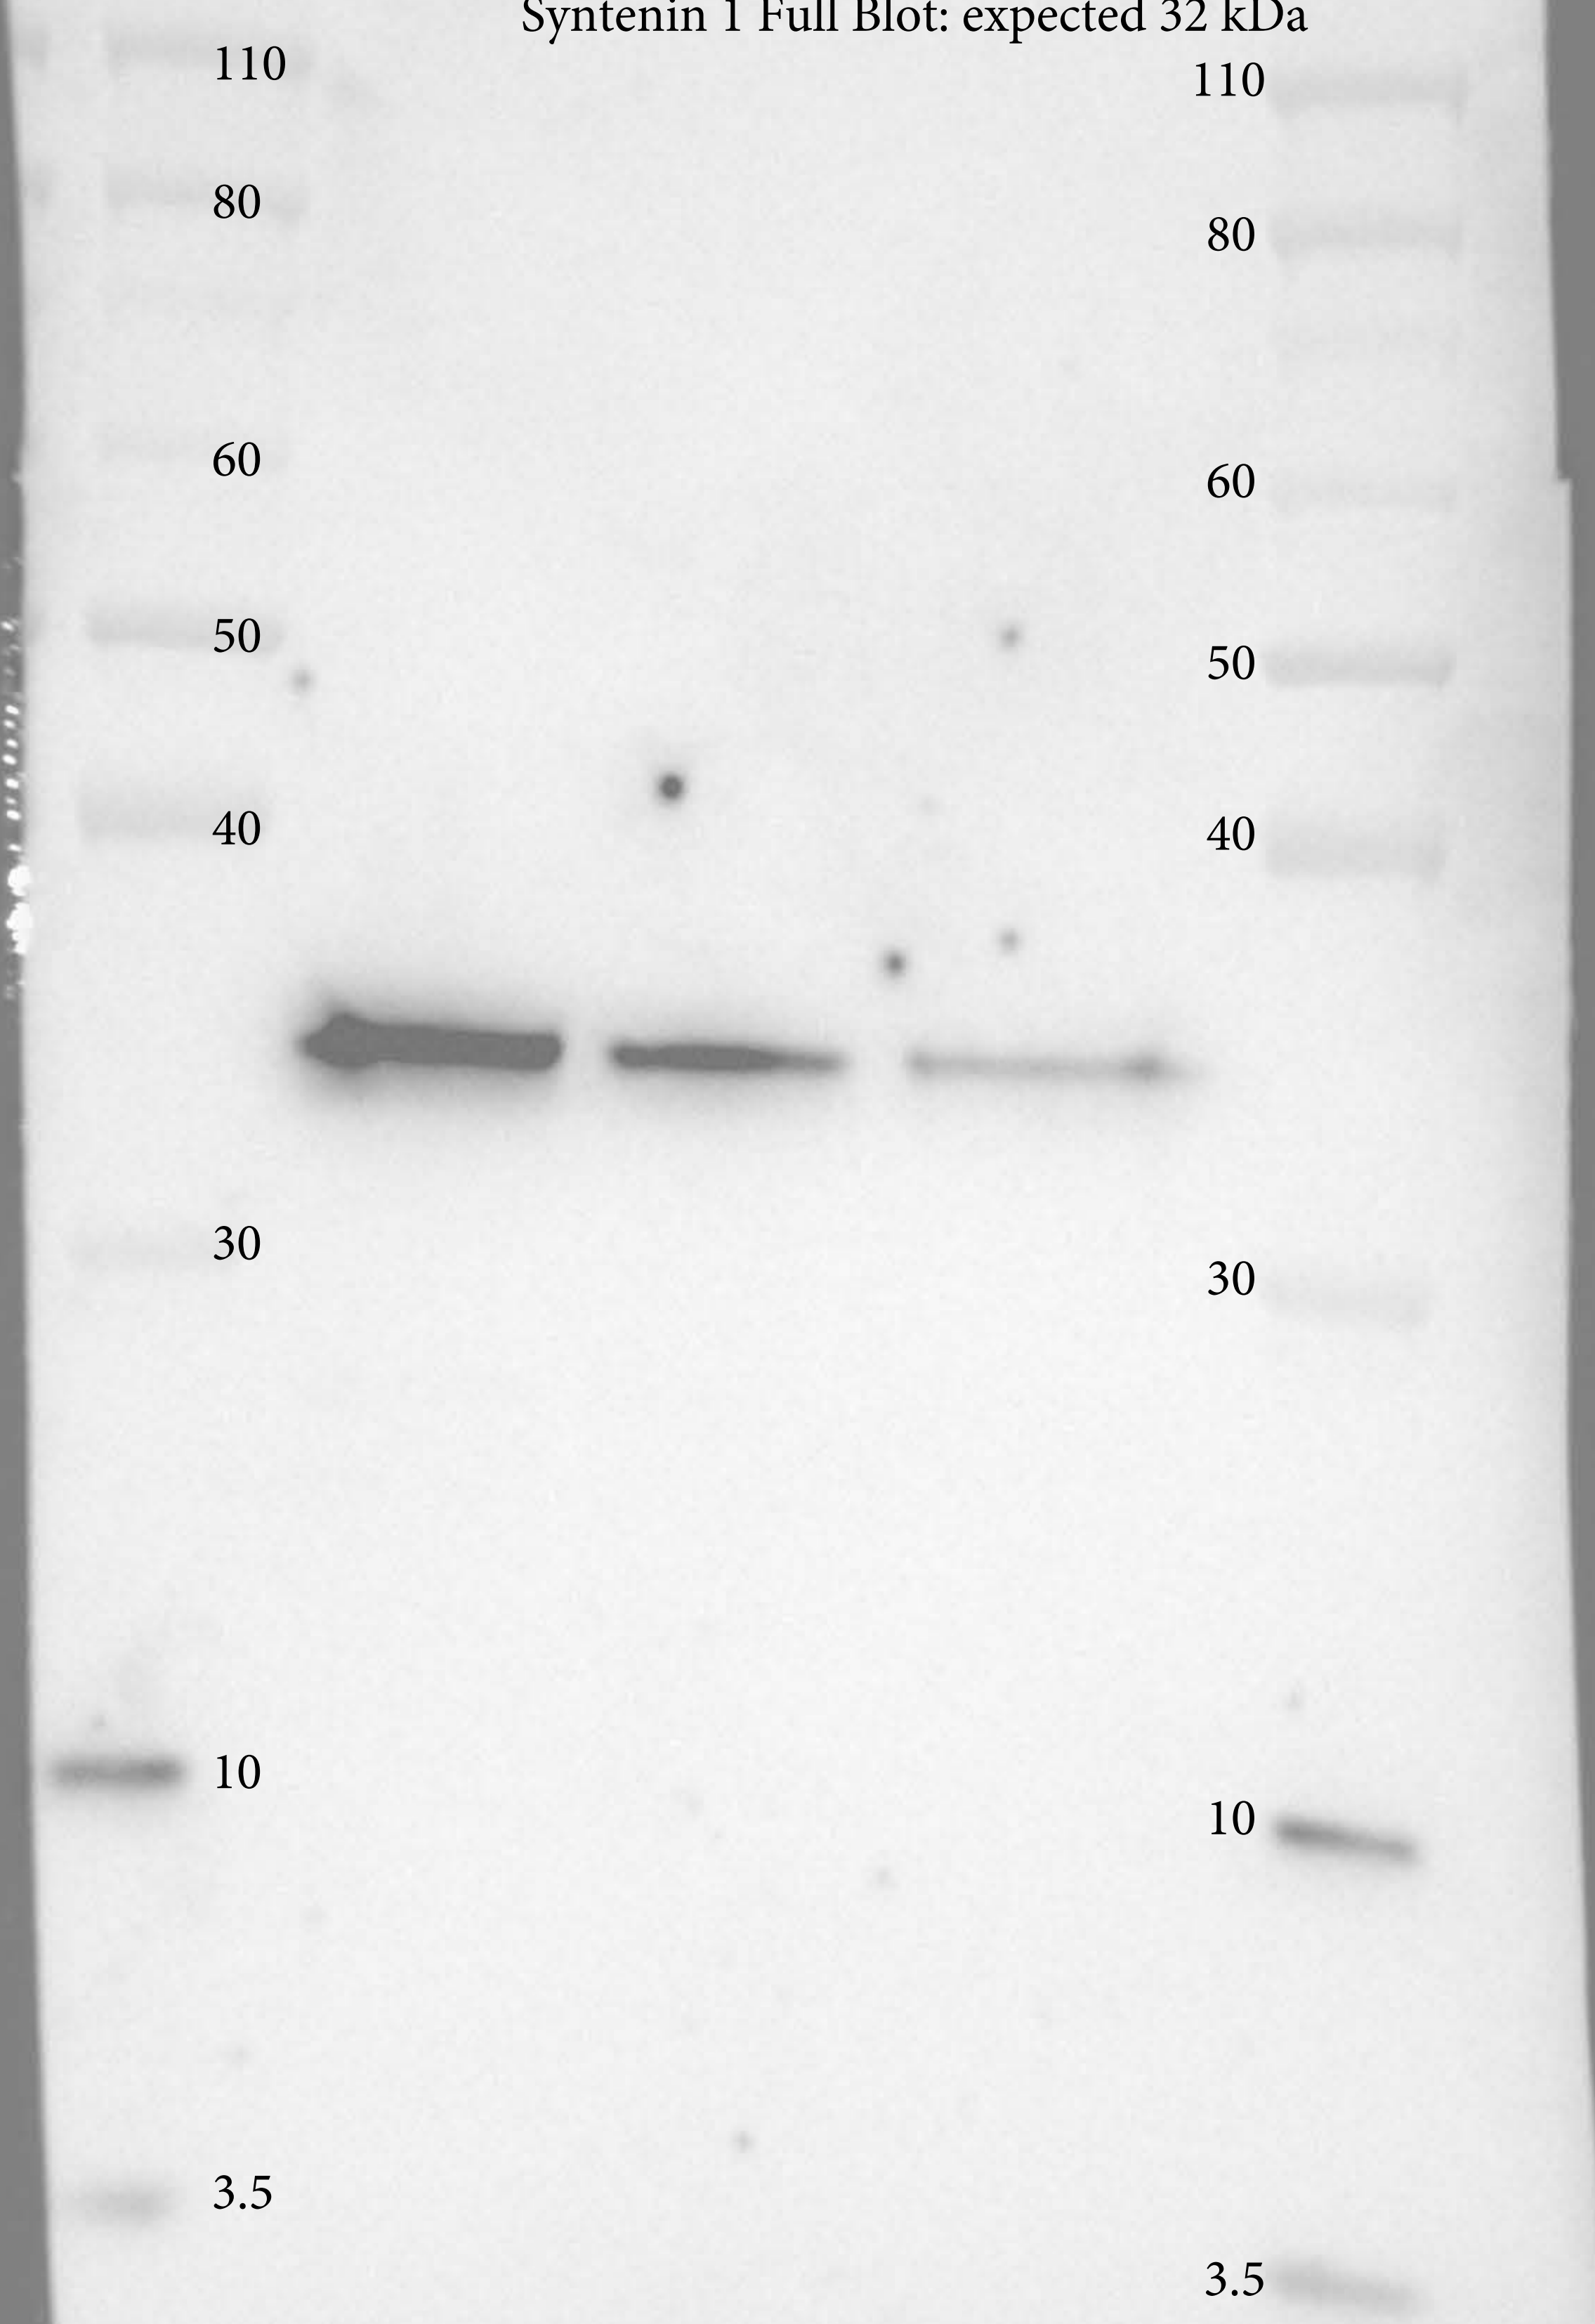

MHC II Full Blot: expected 30 kDa

110

80

60

50

40

30

10

110

80

60

50

40

30

10

X

X

X

X

X

X

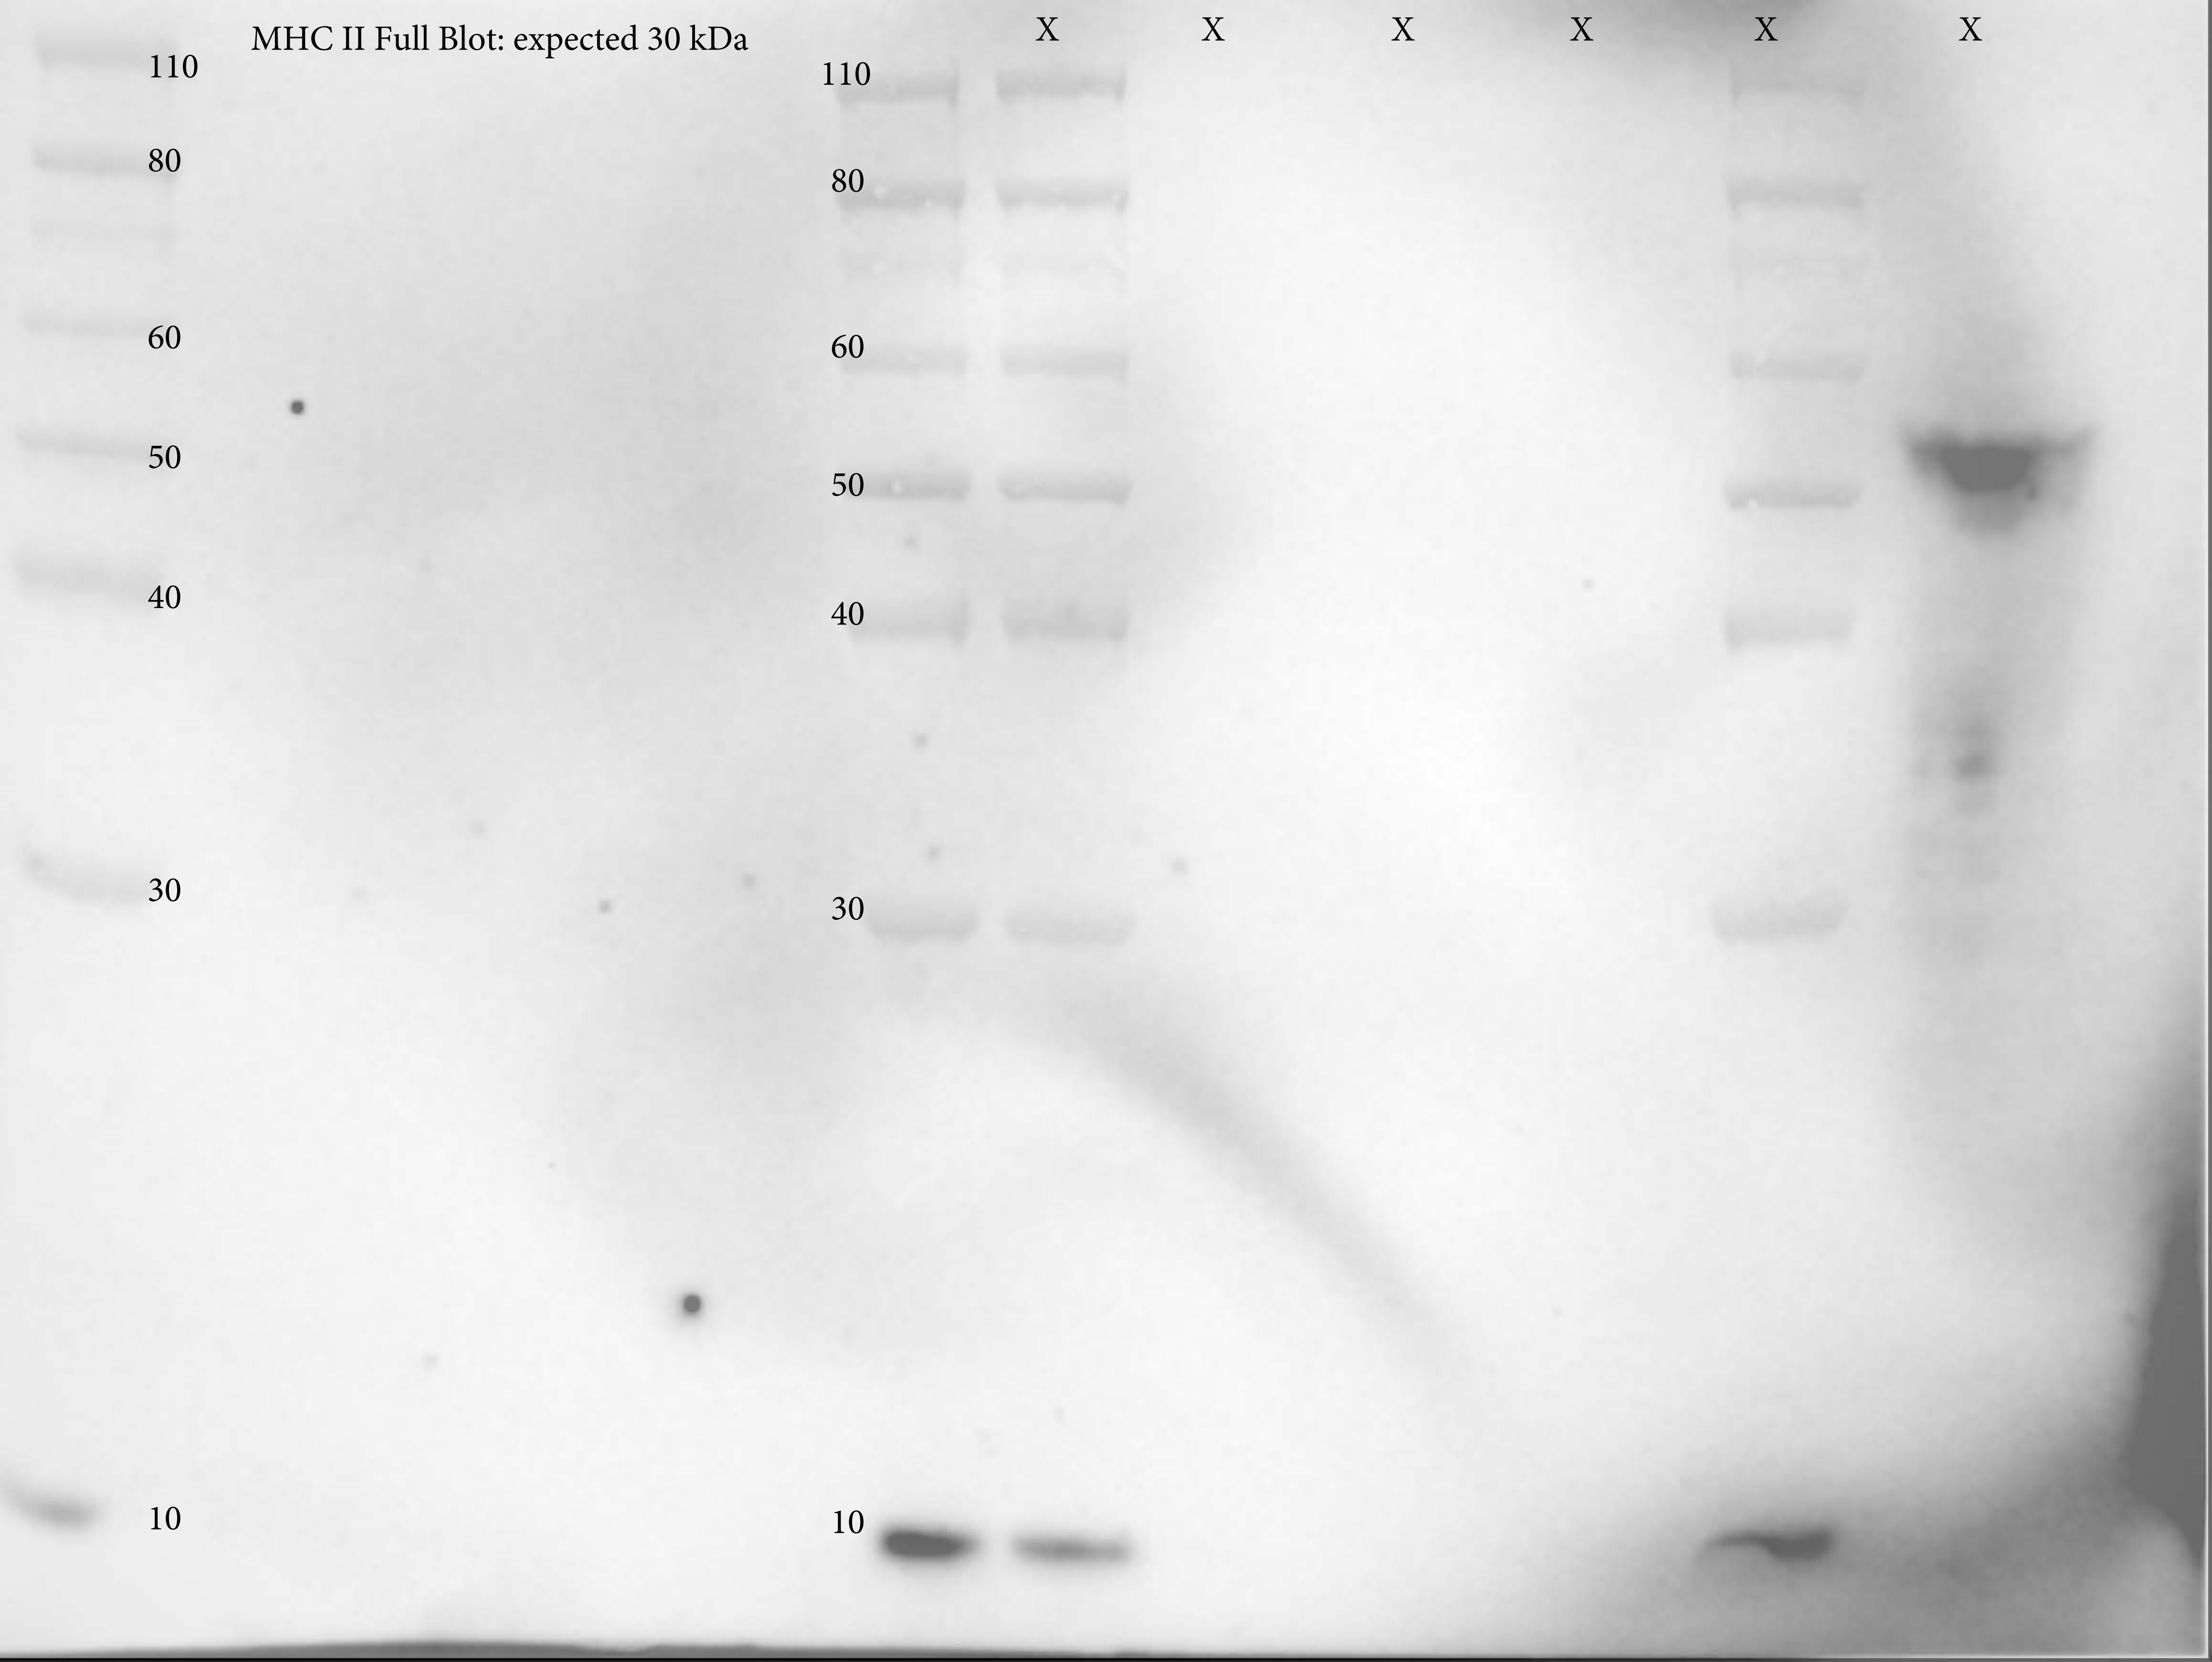

MHC I Full Blot: expected 40 kDa

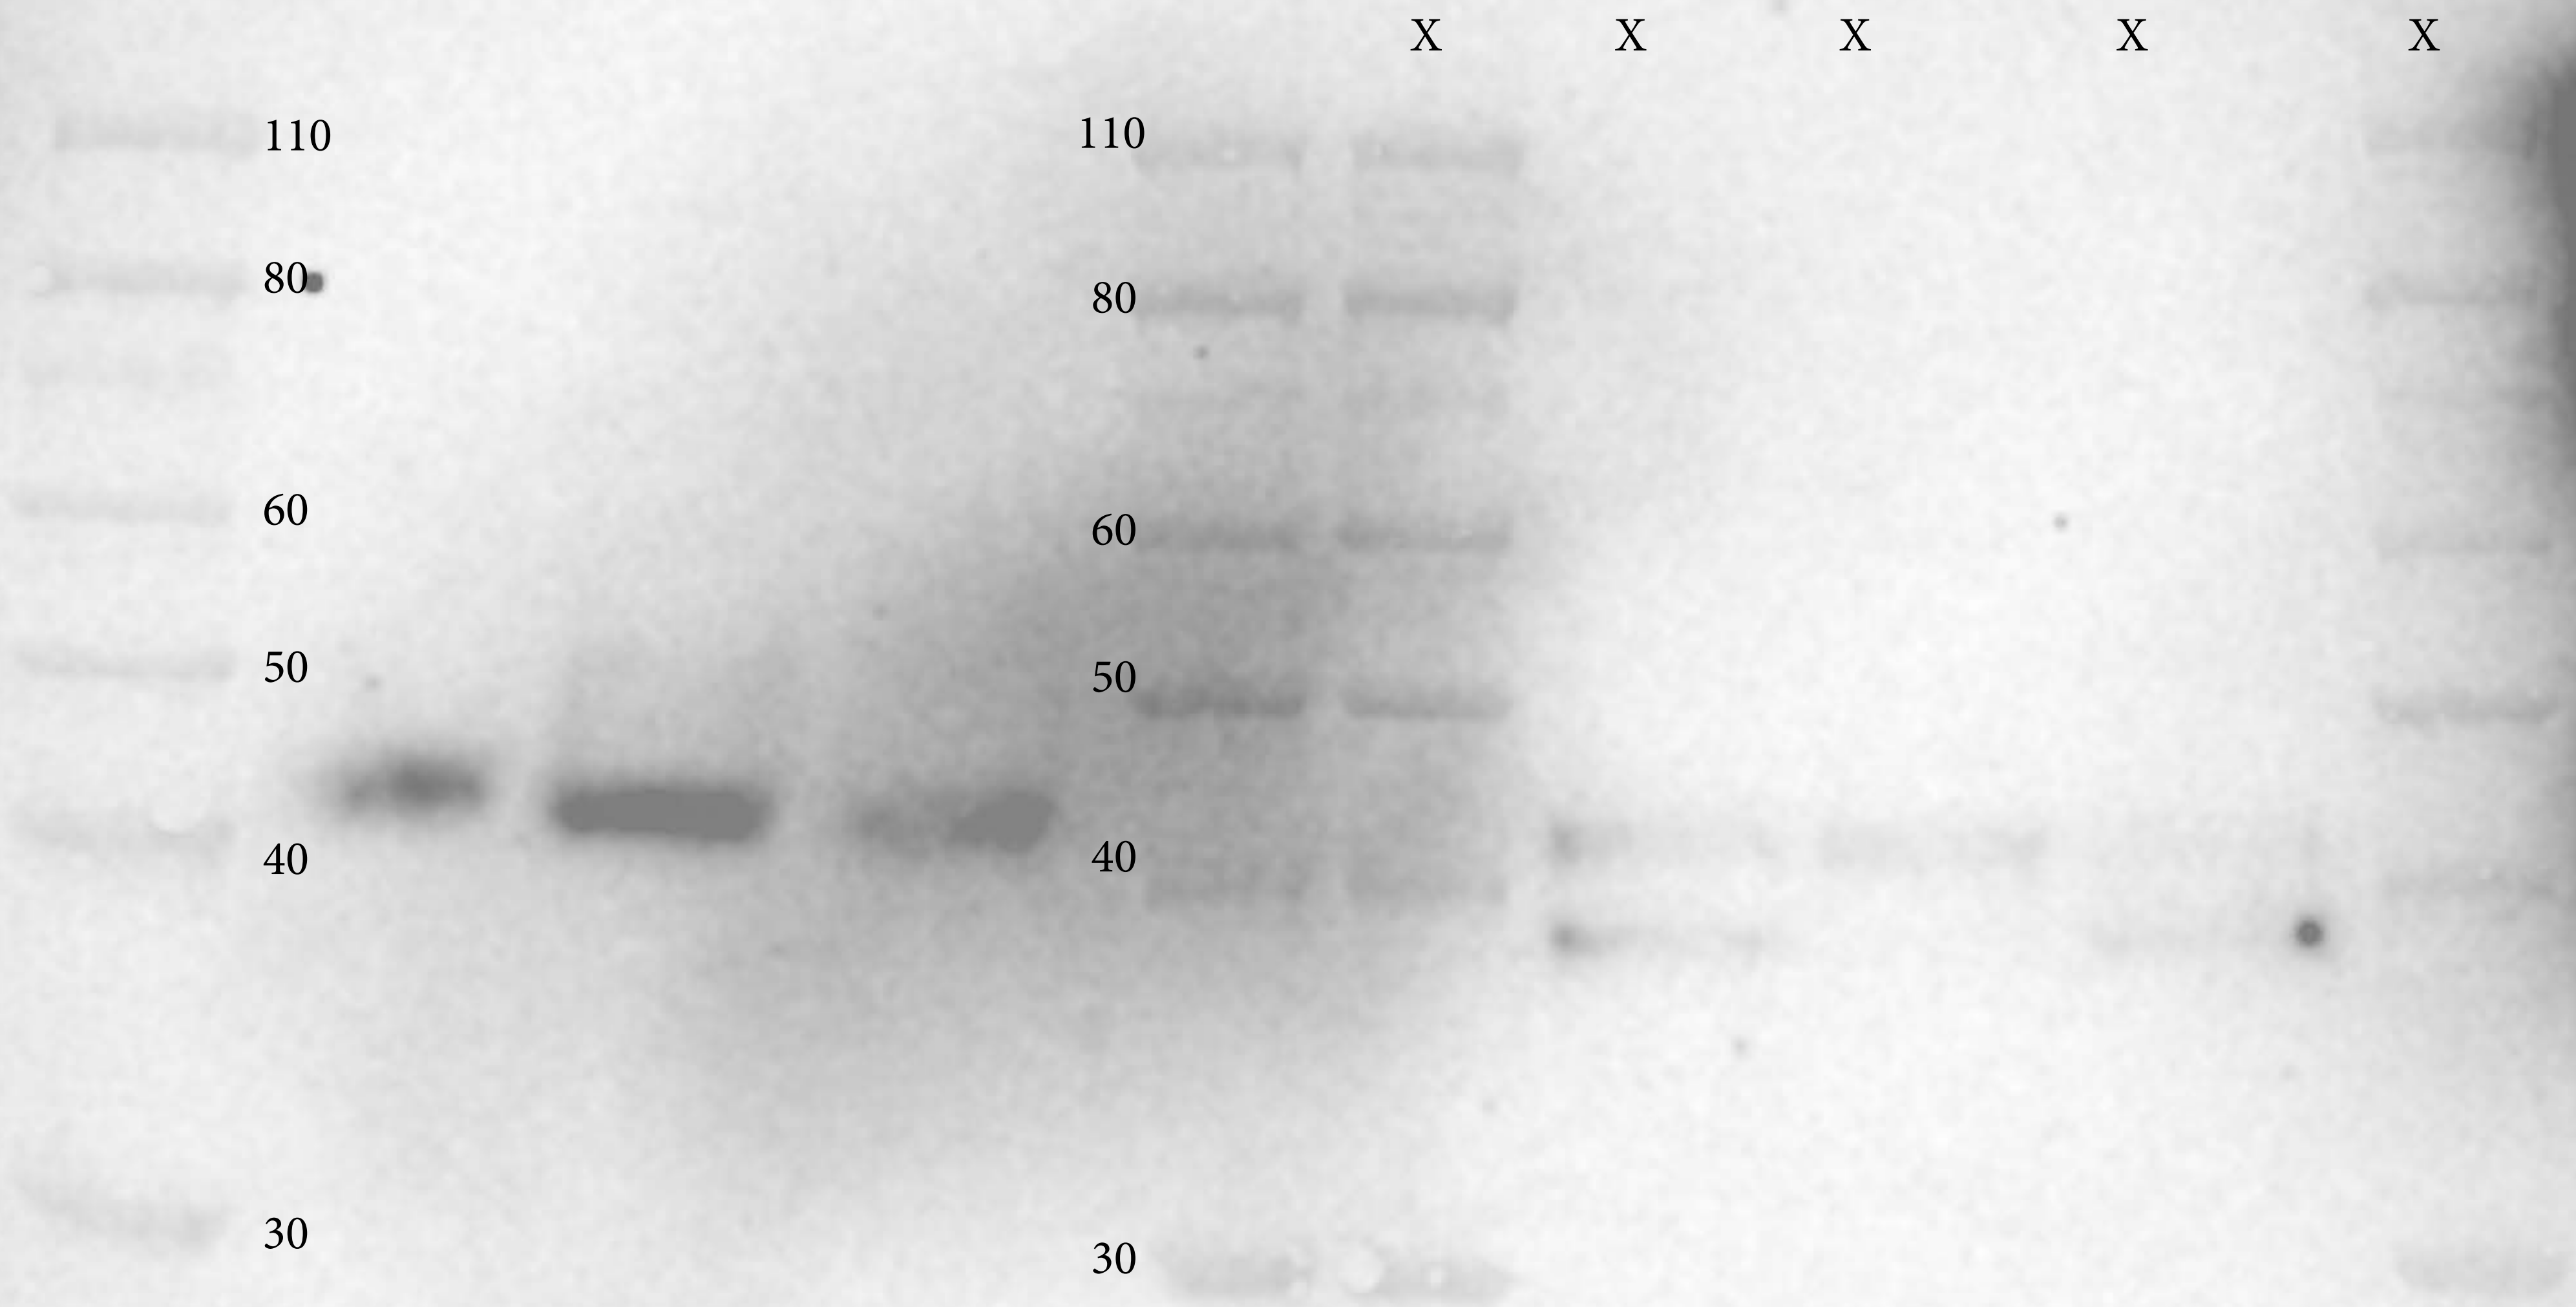

Calreticulin: expected 55 kDa

110  
80  
60  
50  
40  
30  
10

110 X X X X X X  
80  
60  
50  
40  
30  
10

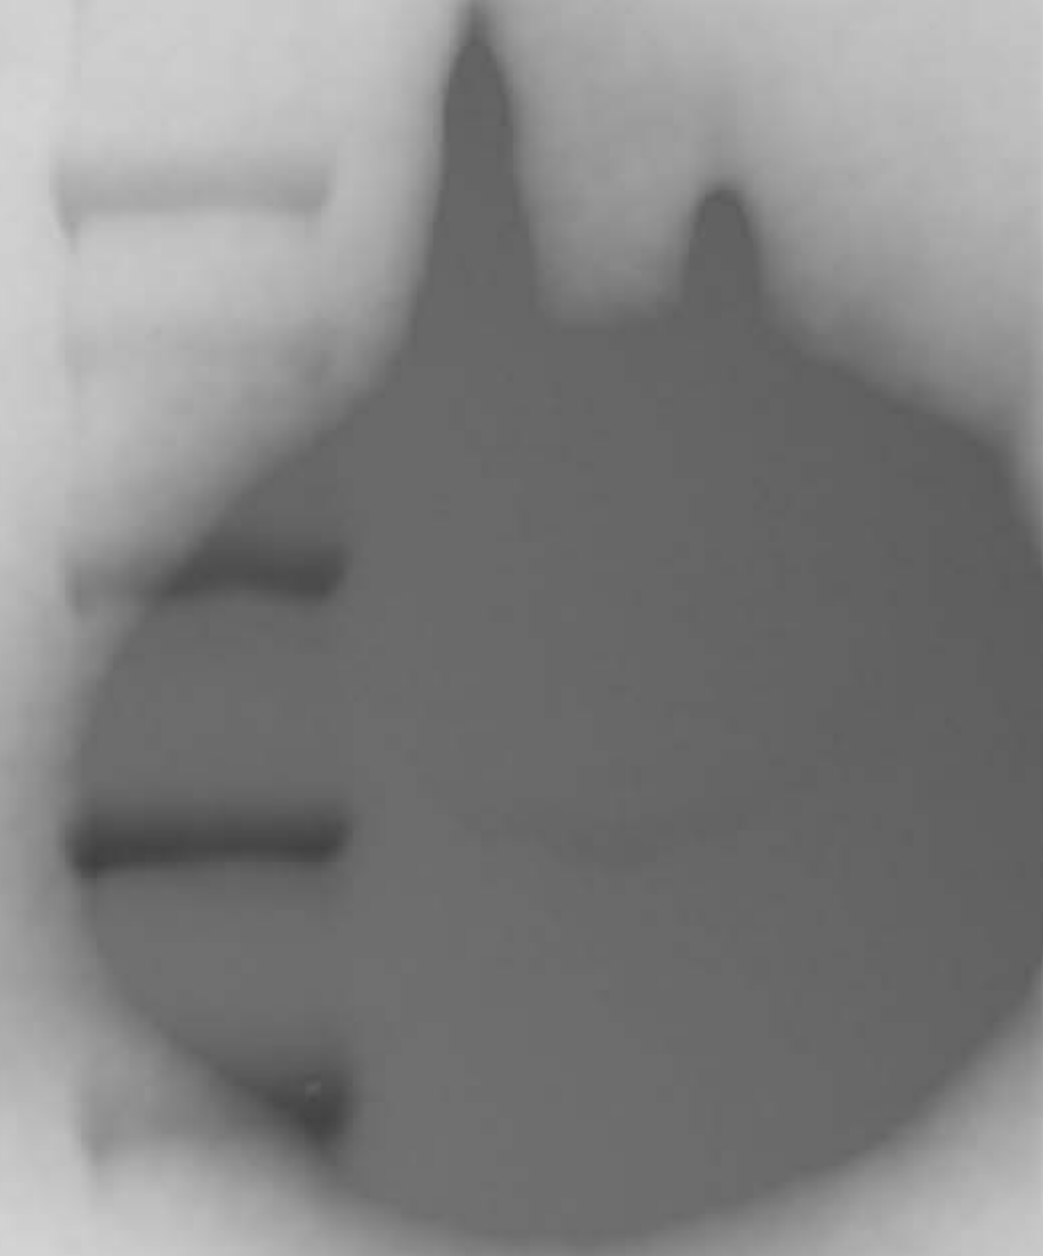

Supplement: pone.0259732.s005.pdf [file pone.0259732.s005.pdf]
